# Supplementary material for: Global expansion of COVID-19 pandemic is driven by population size and airport connections
Source: PeerJ journal article supplement (doi:10.7717/peerj.9708), 2020-08-12
Supplement: Coelho_etal_2020_Data.xlsx [file Coelho_etal_2020_Data.xlsx]

## Sheet: Coelho_etal_2020_Data
Data used in Coelho et al. 2020 - Exponential phase of covid19 expansion is driven by airport connections
Country	ISO3	Long	Lat	Eigenvector_Centrality	HDI_rank	N_School_years	GNI_2018	Population	Annual_pop_growth	Health_investments	b	r2_b_estimate	n_days	r	MeanTemp	MeanPrec
Albania	ALB	20.068	41.142	0.00847194	75	9.6	12557.3	2.9	0	229.52	0.0521553	0.93347	32	1.06292	5.24617	132.514
United_Arab_Emirates	ARE	54.335	23.911	0.0424165	42	9.5	54468.2	9.2	1.9	1312.89	0.130449	0.978512	38	1.12476	22.0754	12.1343
Argentina	ARG	-65.168	-35.376	0.00766334	45	9.9	30022.6	43.4	1	645.19	0.082007	0.898062	36	1.09844	20.0976	52.2989
Armenia	ARM	44.947	40.286	0.00324268	84	11.3	9290.97	3	0.4	187.09	0.0694598	0.92104	37	1.0758	-0.295229	43.9858
Belgium	BEL	4.664	50.643	0.0753232	22	11.4	43106.9	11.3	0.7	4333.74	0.122222	0.920309	49	1.13251	4.87766	84.9992
Bulgaria	BGR	25.232	42.761	0.016654	56	10.8	17971	7.1	-0.7	470.5	0.057012	0.939719	36	1.06934	2.82314	67.826
Bahrain	BHR	50.56	26.022	0.0038616	47	9.4	41046.4	1.4	1.8	760.31	0.0629433	0.98854	46	1.06924	20.6089	2.90943
Bosnia_and_Herzegovina	BIH	17.787	44.168	0.00274919	81	9	12417.8	3.8	-0.1	416.55	0.0754933	0.916893	33	1.07873	1.94488	101.869
Brazil	BRA	-53.09	-10.773	0.0287903	79	7.8	14695.4	207.8	0.9	776.79	0.137015	0.937912	41	1.16223	25.5057	221.354
Canada	CAN	-98.265	61.392	0.14827	10	13.1	39778.3	35.9	1	56.6	0.134744	0.918274	44	1.15009	-20.4251	27.4013
Switzerland	CHE	8.234	46.802	0.077858	2	13.4	50471.3	8.3	1.2	7833.63	0.132721	0.90832	37	1.1419	-0.814458	115.204
Chile	CHL	-71.374	-37.852	0.00510196	38	9.9	21921.7	17.9	1.1	844.13	0.105946	0.91661	39	1.12061	12.8194	52.3673
Colombia	COL	-73.073	3.901	0.0186645	95	7.6	13946.3	48.2	1	360.73	0.0989012	0.941765	37	1.11134	25.2314	110.391
Costa_Rica	CRI	-84.188	9.97	0.0111272	66	8.7	18643.2	4.8	1.1	616.2	0.0501441	0.876926	35	1.05452	23.3959	170.631
Czechia	CZE	15.338	49.743	0.0326214	28	12.3	28244.2	10.5	0.1	1314.18	0.0866302	0.84691	43	1.10324	0.0538291	45.1314
Germany	DEU	10.394	51.107	0.384384	4	13.2	42345.7	80.7	0.1	4595.95	0.132534	0.872608	55	1.14287	2.0024	70.7535
Denmark	DNK	10.046	55.963	0.0521558	5	12.7	46218.7	5.7	0.4	5810.13	0.0710264	0.906584	46	1.09951	1.52528	58.3109
Dominican_Republic	DOM	-70.485	18.894	0.0283488	99	7.7	18853.9	10.5	1.2	271.83	0.100349	0.923047	34	1.12551	22.9703	62.0386
Algeria	DZA	2.632	28.163	0.0290473	83	7.8	15244.5	39.7	1.9	231.69	0.0899364	0.913578	35	1.10464	14.7923	7.46578
Ecuador	ECU	-78.767	-1.427	0.00467846	89	8.3	12240.3	16.1	1.6	342.05	0.104725	0.89066	38	1.13277	21.3728	147.11
Egypt	EGY	29.872	26.494	0.0306501	111	7.1	16002.5	91.5	2.2	108.34	0.0881059	0.984468	40	1.09402	17.1646	4.13971
Spain	ESP	-3.65	40.227	0.471617	27	9.8	32098	46.1	-0.2	2633.19	0.136122	0.846189	53	1.15588	7.32813	81.3936
Estonia	EST	25.528	58.674	0.00459124	30	12.5	28799.1	1.3	-0.3	931.34	0.0592564	0.909688	41	1.0679	-4.05403	31.5585
Finland	FIN	26.266	64.5	0.0267152	23	11.2	37941	5.5	0.5	4117.49	0.0760229	0.945364	43	1.08224	-8.54668	31.1129
France	FRA	2.552	46.565	0.266701	21	11.6	37504.5	64.4	0.5	4358.99	0.124654	0.881331	55	1.14045	5.53044	93.2255
United_Kingdom	GBR	-2.896	54.155	0.463759	16	13.3	38370.9	64.7	0.6	3602.5	0.144941	0.941867	50	1.1557	4.20875	108.645
Greece	GRC	22.96	39.069	0.137453	29	10.5	23117.4	11	-0.4	2310.21	0.0817785	0.940859	31	1.09601	7.60872	87.4423
Croatia	HRV	16.412	45.051	0.0454134	45	11.2	22275.6	4.2	-0.4	1031.07	0.0700678	0.834119	36	1.08785	3.48463	90.7674
Hungary	HUN	19.413	47.167	0.0191944	43	12	21643.7	9.9	-0.3	985.78	0.0858213	0.956557	35	1.0968	1.84143	46.7011
Indonesia	IDN	117.3	-2.23	0.00373227	113	7.9	12973.4	257.6	1.3	85.75	0.10253	0.946511	40	1.1136	25.6121	286.532
India	IND	79.616	22.883	0.0233432	131	6.3	7652	1311.1	1.3	42.64	0.141613	0.980491	39	1.1472	20.0798	8.92163
Ireland	IRL	-8.151	53.176	0.0812886	8	12.3	52462.6	4.7	0.3	5029.03	0.113358	0.93946	41	1.13078	5.33169	141.798
Iran	IRN	54.198	32.739	0.00693567	69	8.8	23053.8	79.1	1.3	356.54	0.0860069	0.824041	58	1.1196	10.5618	24.3355
Iraq	IRQ	43.772	33.048	0.00480341	121	6.6	19015.5	36.4	3.3	136.98	0.0696363	0.925194	40	1.06906	15.1004	38.3843
Israel	ISR	34.966	31.359	0.0198499	19	12.8	43415.8	8.1	1.7	2162.08	0.107684	0.864832	42	1.12569	15.1754	58.0402
Italy	ITA	12.072	42.796	0.275383	26	10.9	31878.5	59.8	0.1	3152.3	0.104744	0.844805	61	1.12885	5.78961	69.3814
Jordan	JOR	36.787	31.253	0.0105534	86	10.1	11414.8	7.6	3.1	278.78	0.034445	0.785689	32	1.0449	12.753	18.584
Japan	JPN	137.991	37.562	0.0508291	17	12.5	31244.2	126.6	-0.1	3810.4	0.0758119	0.993347	63	1.07977	1.39164	102.09
Kuwait	KWT	47.591	29.341	0.00570542	51	7.3	77013.7	3.9	4.8	1158.3	0.0837386	0.979012	42	1.08059	18.3182	9.11746
SriLanka	LKA	80.705	7.608	0.00349173	73	10.9	13546.4	20.7	0.5	78.58	0.0410701	0.987471	31	1.0437	26.2124	118.638
Lithuania	LTU	23.898	55.336	0.0136618	37	12.7	28893.8	2.9	-1.6	808.56	0.0663746	0.864617	34	1.08189	-3.07887	38.2188
Latvia	LVA	24.929	56.858	0.0156548	44	11.7	22885	2	-1.2	1044.11	0.0505036	0.848512	35	1.05894	-3.72472	35.3854
Morocco	MAR	-6.318	31.884	0.0639692	123	5	8965.34	34.4	1.4	154.42	0.0990455	0.953214	33	1.11331	10.6957	40.7905
Moldova	MDA	28.474	47.194	0.00547249	107	11.9	5975.44	4.1	-0.1	180.91	0.10899	0.950511	32	1.11197	-0.528566	54.2133
Mexico	MEX	-102.533	23.95	0.122463	77	8.6	19448.6	127	1.4	544.58	0.119208	0.975967	37	1.13601	17.1419	21.4751
Malaysia	MYS	109.708	3.792	0.0081672	59	10.1	29041.8	30.3	1.5	304.53	0.0801068	0.839663	46	1.08978	25.5779	358.637
Netherlands	NLD	5.603	52.249	0.107225	7	11.9	47804.3	16.9	0.4	5103.79	0.108745	0.900093	49	1.12449	5.01767	75.1709
Pakistan	PAK	69.386	29.967	0.0090036	147	5.1	7109.22	188.9	2.1	28.07	0.0968398	0.9518	39	1.11359	13.6457	9.67696
Panama	PAN	-80.103	8.507	0.0110252	60	9.9	24113.8	3.9	1.6	535.93	0.097327	0.916561	37	1.11314	25.3715	109.499
Peru	PER	-74.376	-9.164	0.00914885	87	9	13595.2	31.4	1.3	227.67	0.140552	0.990049	38	1.15046	20.0923	179.921
Philippines	PHL	122.879	11.742	0.00488247	116	9.3	10171.5	100.7	1.6	86.99	0.10673	0.91366	41	1.10909	25.3246	222.295
Poland	POL	19.401	52.125	0.0740465	36	11.9	25219.4	38.6	0	756.74	0.108997	0.926577	41	1.12232	-0.429983	35.0726
Portugal	PRT	-8.563	39.601	0.108532	41	8.9	25620.7	10.3	-0.4	2054.04	0.11448	0.859653	42	1.13789	10.0218	141.912
Qatar	QAT	51.191	25.315	0.0155031	33	9.8	103741	2.2	4.7	1474.09	0.0806967	0.963862	43	1.08403	20.878	3.63318
Romania	ROU	24.969	45.844	0.0311354	50	10.8	24224.2	19.5	-0.8	423.08	0.111528	0.934207	41	1.11886	0.411933	56.4403
Russia	RUS	96.578	61.946	0.0675074	49	12	22574.5	143.5	0	577.9	0.16972	0.989724	38	1.18598	-20.8309	22.1798
Saudi_Arabia	SAU	44.546	24.123	0.0205459	38	9.6	56113.7	31.5	2.3	768.37	0.113659	0.964899	40	1.13013	19.6841	11.9934
Singapore	SGP	103.808	1.352	0.0133327	5	11.6	76588.8	5.6	2	1485.03	0.0861264	0.984435	55	1.09087	26.9699	247.067
Serbia	SRB	20.599	43.867	0.0164988	66	10.8	14242.3	8.9	-0.5	543.6	0.121752	0.960933	36	1.12287	2.19077	77.5565
Slovakia	SVK	19.492	48.708	0.00549144	40	12.2	24600.3	5.4	0.1	1154.93	0.0665032	0.979372	37	1.0724	-0.484983	50.0522
Sweden	SWE	16.74	62.79	0.0561325	14	12.3	43369.1	9.8	0.8	5093.75	0.0914901	0.938412	49	1.10532	-7.02262	38.6127
Turkey	TUR	35.18	39.061	0.113086	71	7.9	31305.9	78.7	1.7	504.07	0.15509	0.89599	37	1.19053	4.83566	92.9693
Uruguay	URY	-56.012	-32.8	0.00133617	54	8.6	22465	3.4	0.3	935.74	0.0398381	0.860299	35	1.04886	22.792	109.72
US	USA	-112.492	45.696	0.313475	10	13.2	53681.3	321.8	0.8	7780.42	0.178847	0.915437	53	1.18989	-1.84411	56.7286
South_Africa	ZAF	25.093	-28.999	0.00895422	119	10.3	14014.9	54.5	1.1	464.11	0.0779202	0.830693	37	1.10298	23.1483	57.5012

## Sheet: MetaData
MetaData - Description of variables presented in Coelho et al. 2020 Data
Country	The name of each country
ISO3	ISO 3166-1 alpha-3 codes are three-letter country codes defined in ISO 3166-1.
Long	x coordinate - Longitude
Lat	y coordinate - Latitude
Eigenvector_Centrality	Network centrality measure
HDI_rank	Human Development Index
N_School_years	Mean number of school years in 2015
GNI_2018	Gross national income (GNI) per capita from 2018
Population	population size
Annual_pop_growth	average annual population growth rate between 2010-2015
Health_investments	mean value of health investment in each country by averaging the annual health investments between 2005-2015
b	regression coefficient of the log growth series to be used as the response variable in our models
r2_b_estimate	Goodness of fit for the estimated coeffcient of the log growth series (b)
n_days	Number of days after the 100th case
r	intrinsic growth rate for exponential model
MeanTemp	Mean Temperature
MeanPrec	Mean Precipitation
