# Supplementary material for: Global expansion of COVID-19 pandemic is driven by population size and airport connections
Source: PeerJ journal article supplement (doi:10.7717/peerj.9708), 2020-08-12

Coefficient of the log growth series

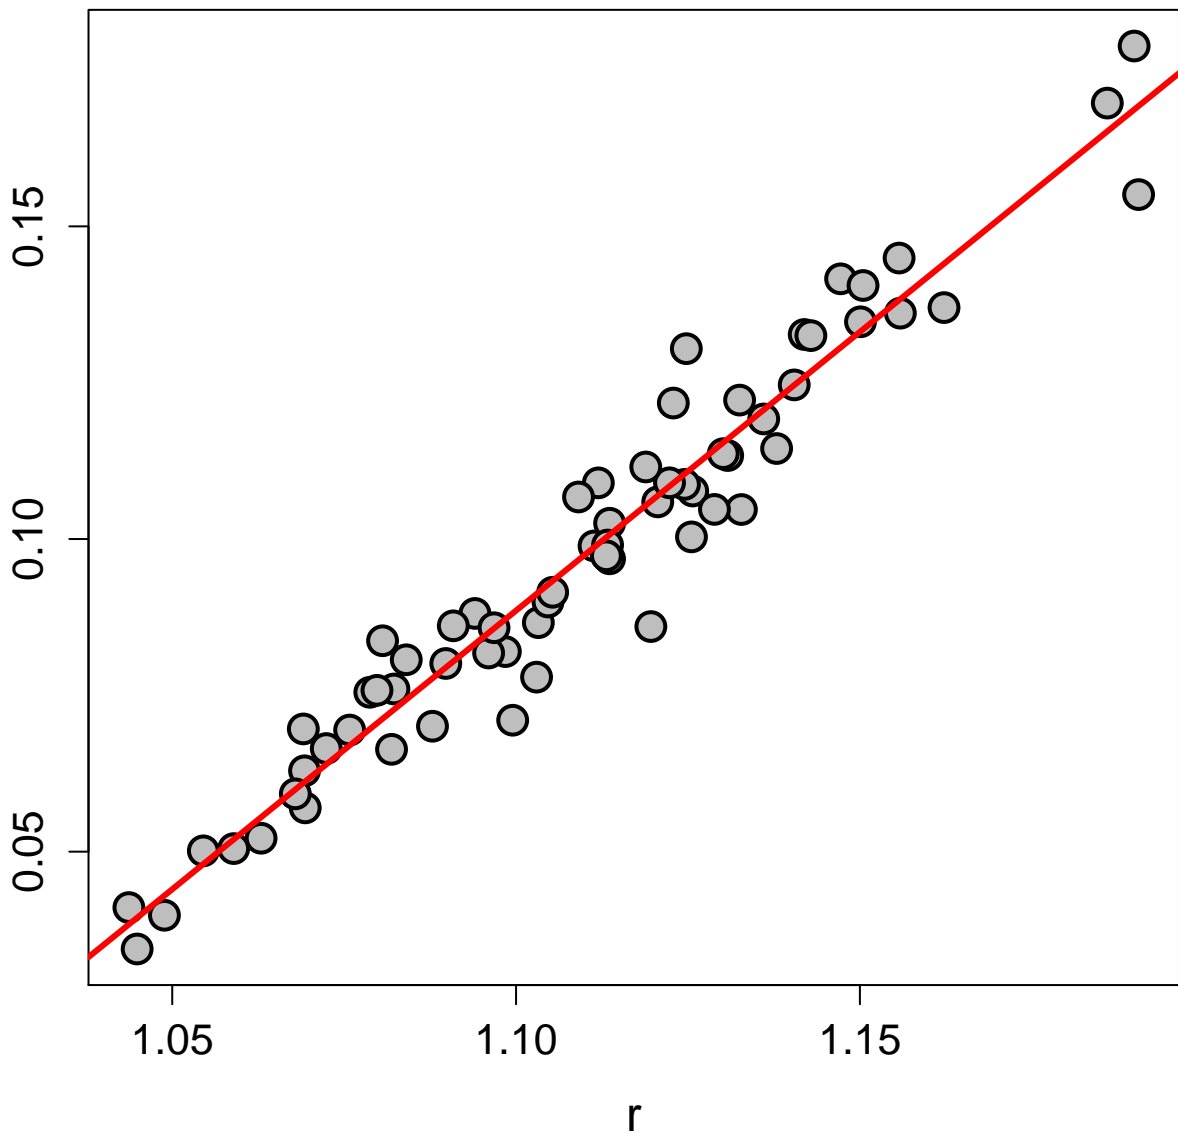

Supplement: Fig_S2.pdf [file Fig_S2.pdf]
