# Supplementary figures and images for: Global expansion of COVID-19 pandemic is driven by population size and airport connections
Source: PeerJ journal article supplement (doi:10.7717/peerj.9708), 2020-08-12

**A**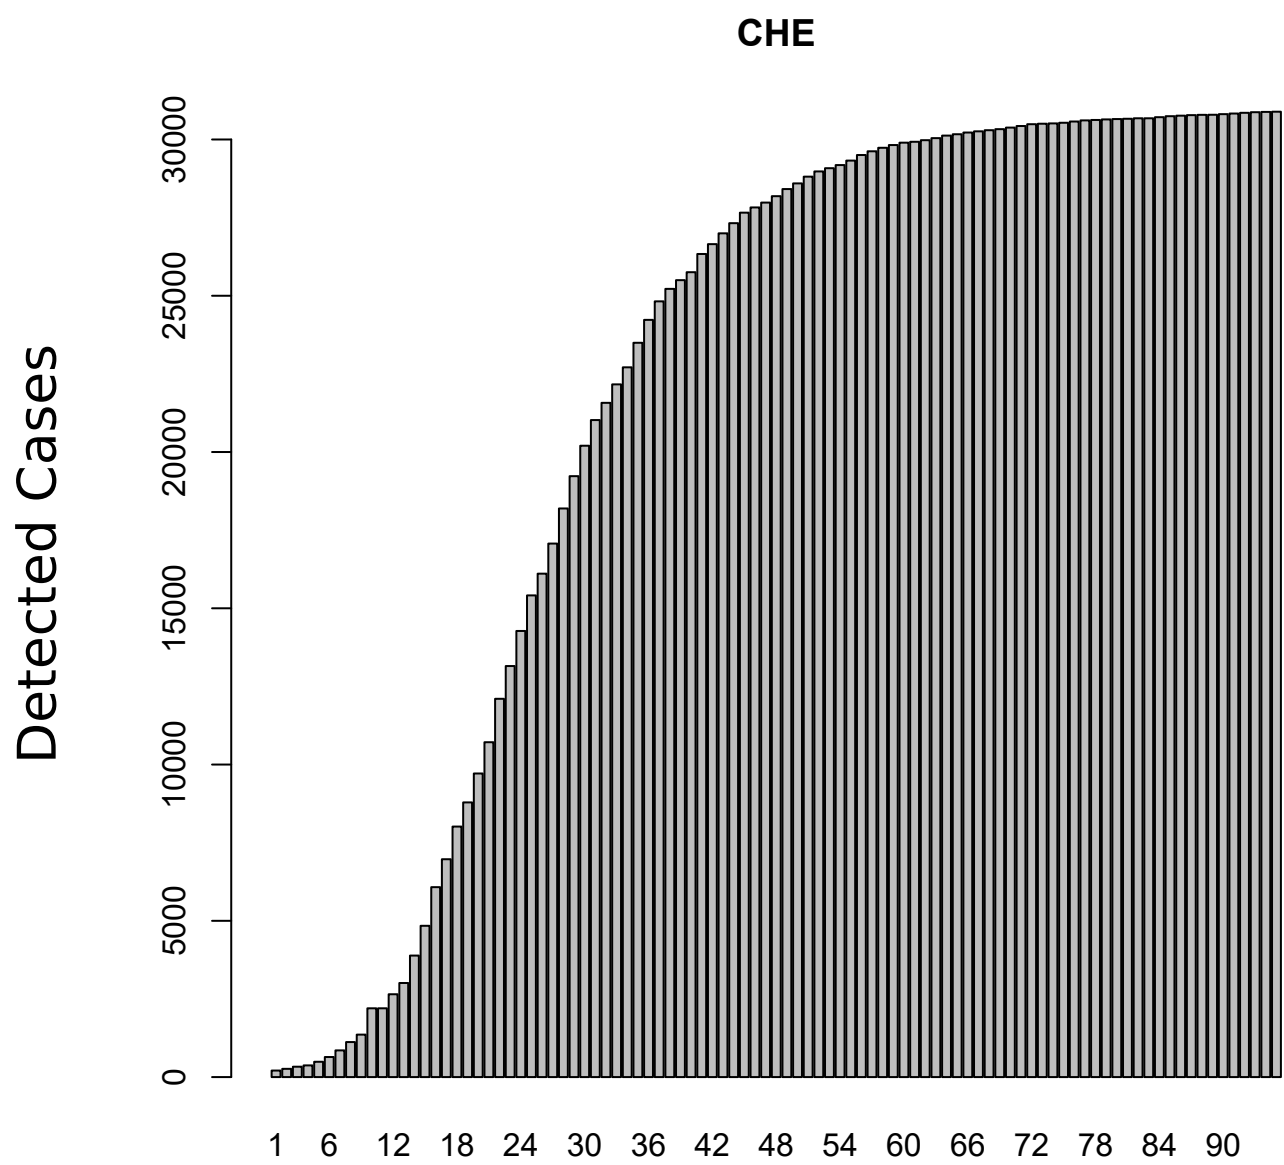**B**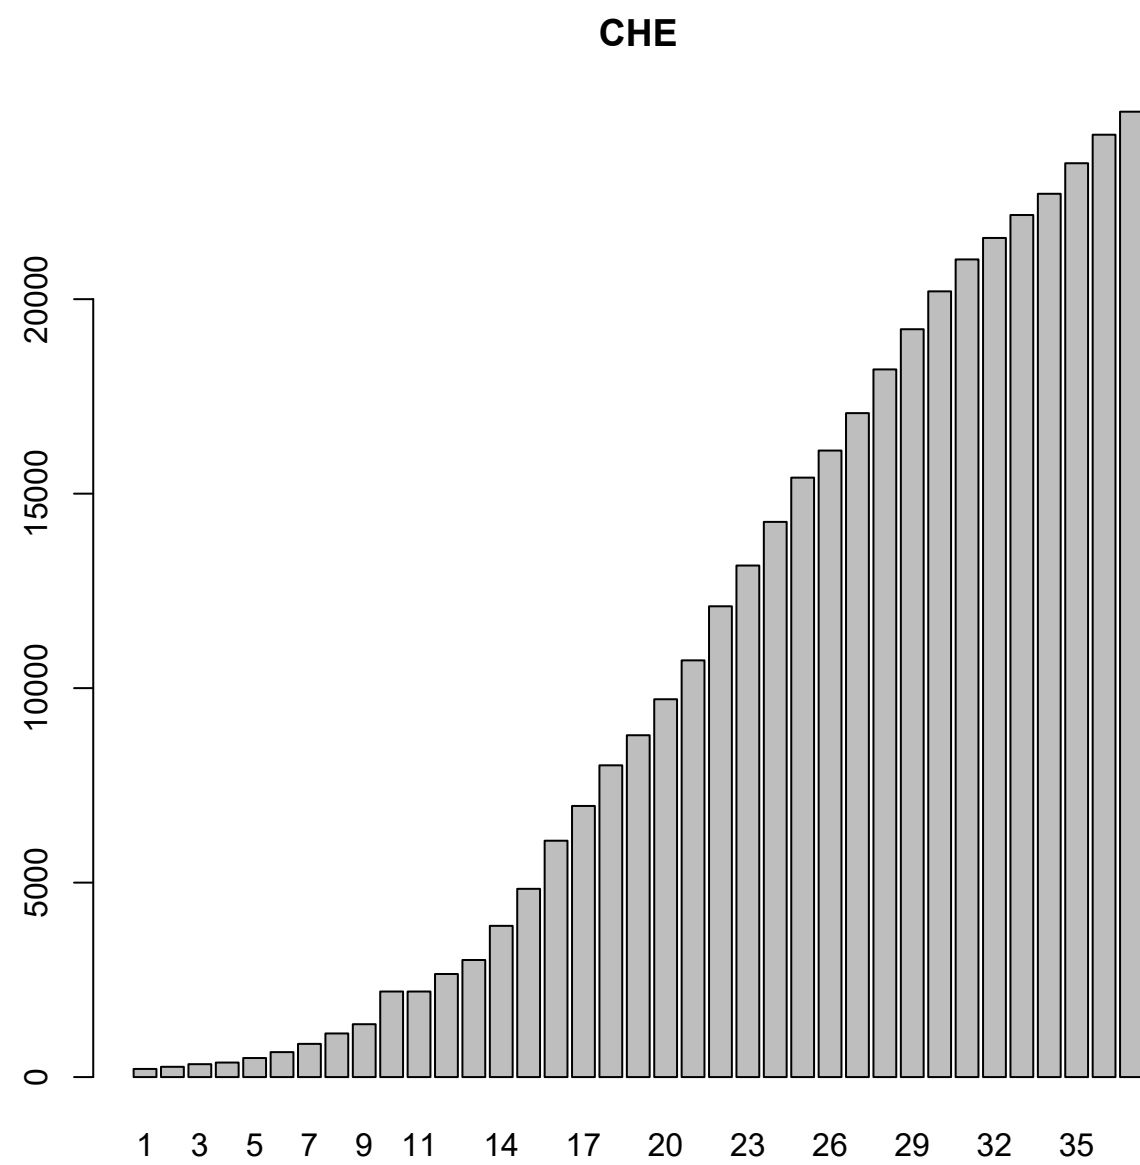**C**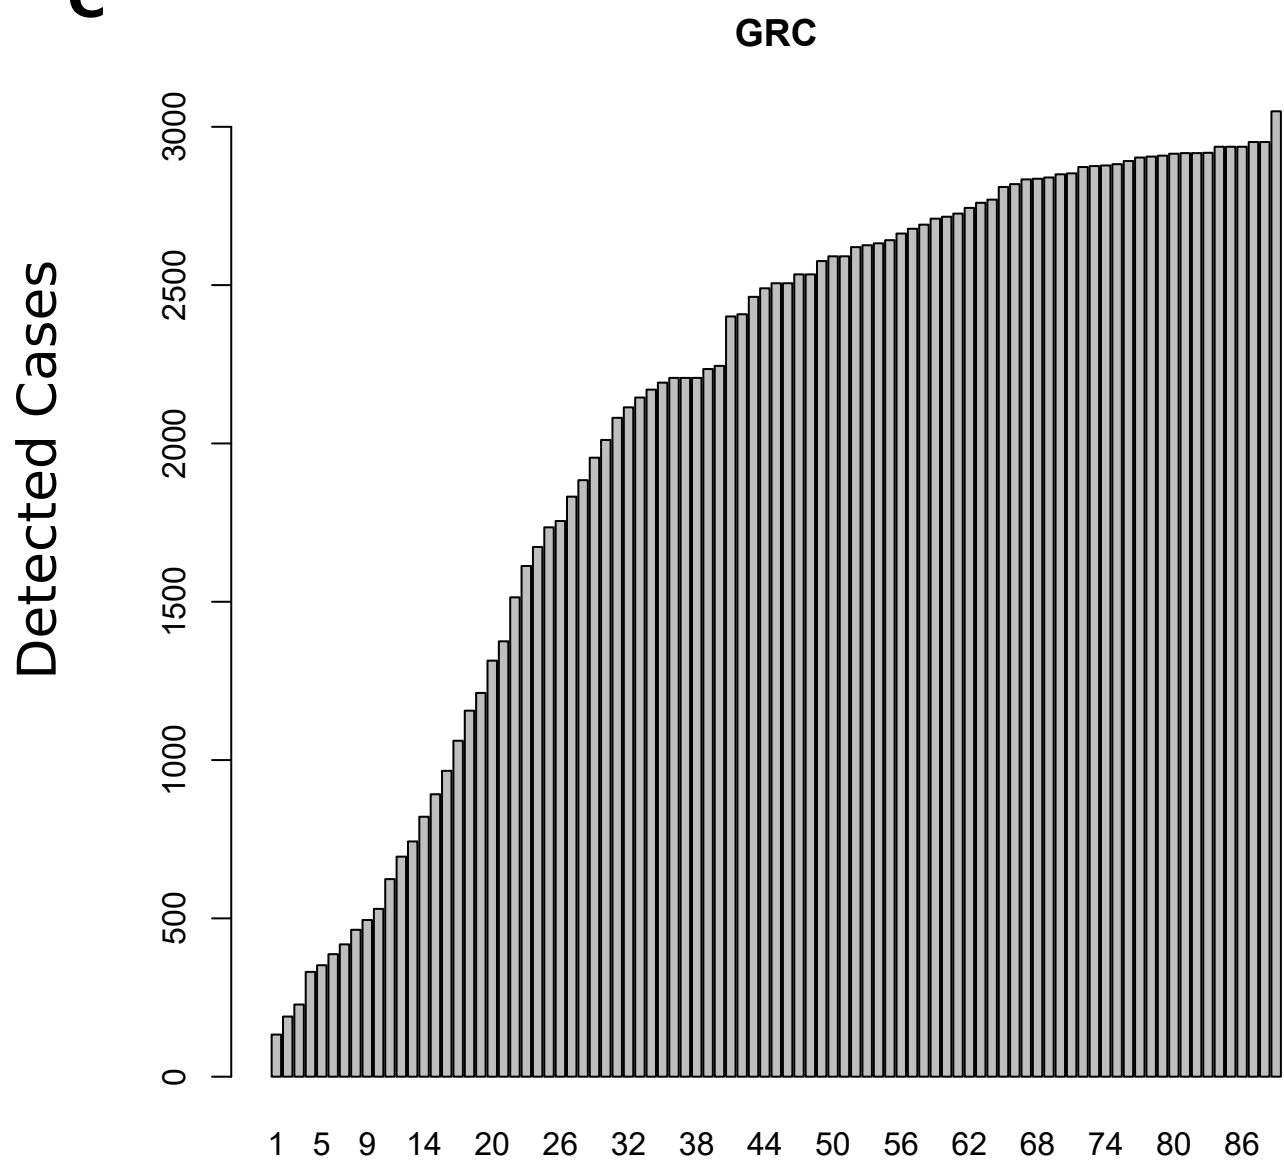**D**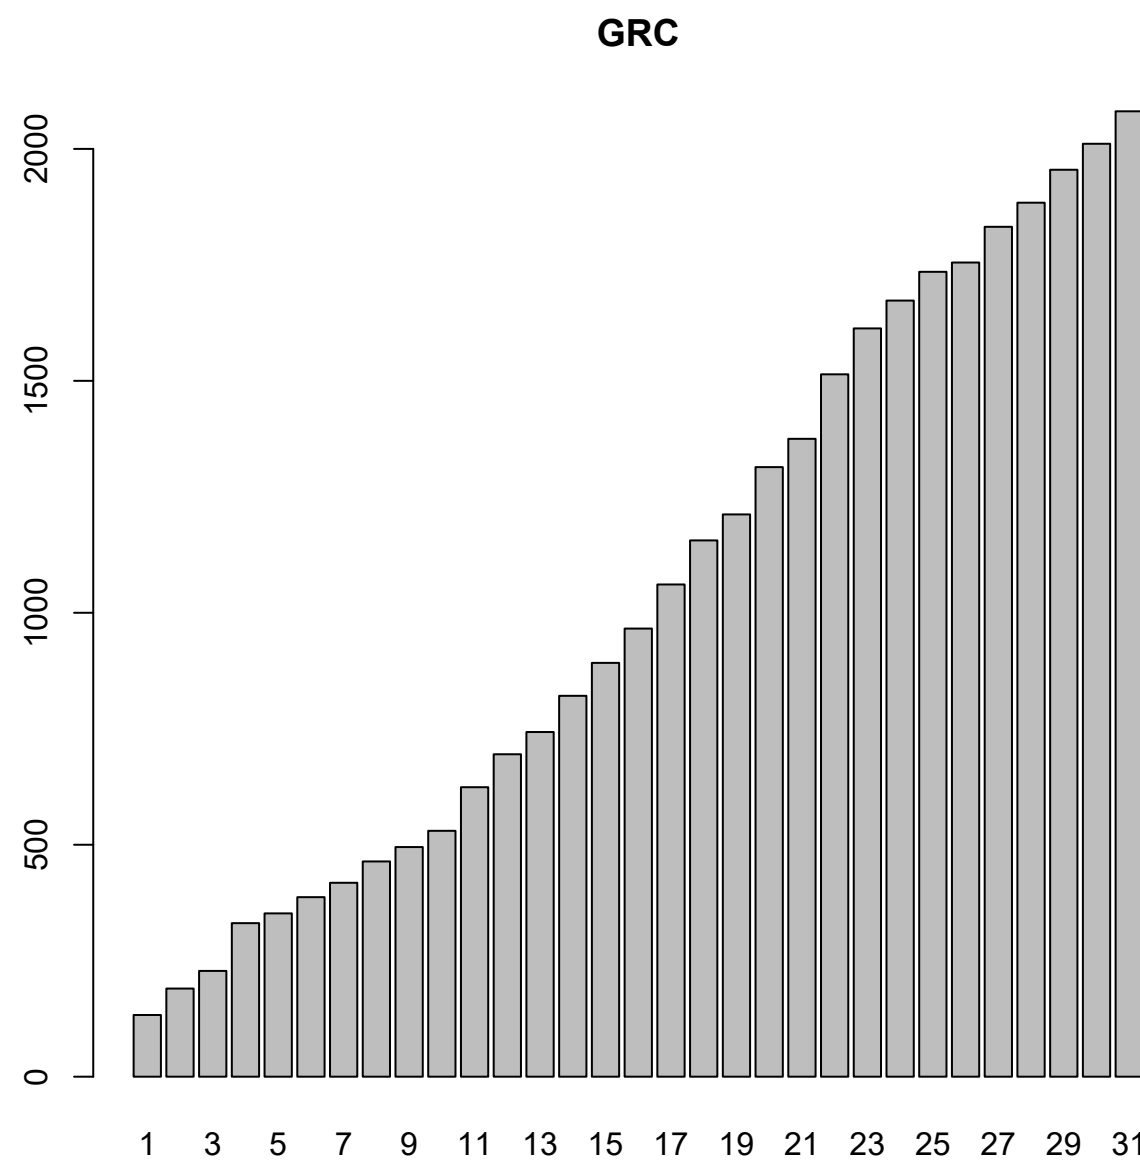

Supplement: Fig_S1.pdf [file Fig_S1.pdf]
